# Supplementary material
Source: PubMed Central journal article supplement (PMC7241398)
Supplement: mmc1.pdf [file mmc1.pdf]

**Cell, Volume 182**

**Supplemental Information**

**Pathogenesis of SARS-CoV-2  
in Transgenic Mice Expressing Human  
Angiotensin-Converting Enzyme 2**

**Ren-Di Jiang, Mei-Qin Liu, Ying Chen, Chao Shan, Yi-Wu Zhou, Xu-Rui Shen, Qian Li, Lei Zhang, Yan Zhu, Hao-Rui Si, Qi Wang, Juan Min, Xi Wang, Wei Zhang, Bei Li, Hua-Jun Zhang, Ralph S. Baric, Peng Zhou, Xing-Lou Yang, and Zheng-Li Shi**

**Table S1. Experimental strategy and preliminary results from the mice used in current study, Related to Figure 1.**

| Group   | Sex | Body Weight* |       |       |       |       |       |       |       | End point         | Symptoms                                                             |
|---------|-----|--------------|-------|-------|-------|-------|-------|-------|-------|-------------------|----------------------------------------------------------------------|
|         |     | Day 0        | 1 DPI | 2 DPI | 3 DPI | 4 DPI | 5 DPI | 6 DPI | 7 DPI |                   |                                                                      |
| Mock-1  | ♂   | 32.48        | 31.32 | 32.08 | 32.26 | 31.94 | 31.64 | 32    | 31.83 |                   | No visible symptoms                                                  |
| Mock-2  | ♂   | 28.88        | 27.19 | 27.98 | 28.3  | 27.89 | 27.34 | 28.63 | 28.43 | Sacrificed        |                                                                      |
| Mock-3  | ♀   | 18           | 17.99 | 18.94 | 18.79 | 19.14 | 19.05 | 19.6  | 19.36 |                   |                                                                      |
| Mock-4  | ♀   | 20.79        | 20.55 | 20.71 | 21    | 20.89 | 20.53 | 21.04 | 21.22 |                   |                                                                      |
| G-D1-M1 | ♂   | 28.64        | 26.7  |       |       |       |       |       |       | Sacrificed        | No visible symptoms                                                  |
| G-D1-M2 | ♂   | 30.65        | 30.6  |       |       |       |       |       |       | Sacrificed        |                                                                      |
| G-D1-M3 | ♂   | 30.59        | 30.2  |       |       |       |       |       |       | Sacrificed        |                                                                      |
| G-D1-M4 | ♂   | 33.15        | 33.4  |       |       |       |       |       |       | Sacrificed        |                                                                      |
| G-D1-M5 | ♀   | 21.28        | 21.5  |       |       |       |       |       |       | Sacrificed        |                                                                      |
| G-D1-M6 | ♀   | 22.67        | 22.32 |       |       |       |       |       |       | Sacrificed        |                                                                      |
| G-D3-M1 | ♂   | 27.67        | 27.17 | 26.83 | 25.81 |       |       |       |       | Sacrificed        | No visible symptoms                                                  |
| G-D3-M2 | ♂   | 29.18        | 28.88 | 29.94 | 29.3  |       |       |       |       | Sacrificed        |                                                                      |
| G-D3-M3 | ♂   | 31.28        | 31.13 | 31.22 | 29.96 |       |       |       |       | Sacrificed        |                                                                      |
| G-D3-M4 | ♂   | 34.46        | 32.79 | 33.52 | 32.01 |       |       |       |       | Sacrificed        |                                                                      |
| G-D3-M5 | ♀   | 20.36        | 19.99 | 20.48 |       |       |       |       |       | Dead              |                                                                      |
| G-D3-M6 | ♀   | 18.87        | 19.25 | 19.12 |       |       |       |       |       | Dead              |                                                                      |
| G-D5-M1 | ♂   | 23.3         | 23.93 | 24.28 | 24.63 | 25.15 | 25.47 |       |       | Sacrificed        | No visible symptoms                                                  |
| G-D5-M2 | ♂   | 28.23        | 25.27 | 22.36 | 25    | 26.84 | 26.82 |       |       | Sacrificed        | Weight loss and dyspnea 1- 2 DPI, later recovered                    |
| G-D5-M3 | ♂   | 22.36        | 23.05 | 24.12 | 22.51 | 17.39 |       |       |       | Dead              | Dead 4 DPI                                                           |
| G-D5-M4 | ♂   | 29.7         | 30.15 | 30.84 | 31.34 | 25.94 | 23.55 |       |       | Dead              | Weight loss and dyspnea, shrinkage, torpor 4 DPI, dead 5 DPI         |
| G-D5-M5 | ♀   | 19.44        | 18.81 | 18.75 | 19.79 | 19.24 | 19.19 |       |       | Sacrificed        | No visible symptoms                                                  |
| G-D5-M6 | ♀   | 22.21        | 21.64 | 22.13 | 22.47 | 22.46 | 22.02 |       |       | Sacrificed        | No visible symptoms                                                  |
| G-D7-M1 | ♂   | 26.03        | 25.05 | 25.02 | 25.5  | 22.98 | 19.4  |       |       | Dying, Sacrificed | Weight loss 4 DPI, shrinkage, dyspnea, torpor, neurological symptoms |
| G-D7-M2 | ♂   | 29.3         | 28.37 | 29.19 | 29.51 | 30.43 | 28.24 | 23.56 | 22.49 | Dying, Sacrificed | Weight loss 6 DPI, shrinkage, dyspnea, torpor, neurological symptoms |
| G-D7-M3 | ♂   | 31.76        | 30.16 | 31.32 | 31.51 | 31.39 | 31.45 | 30.82 | 30.35 | Sacrificed        | No visible symptoms                                                  |
| G-D7-M4 | ♂   | 29.11        | 29.49 | 29.73 | 29.68 | 29.53 | 29.46 | 29.91 | 28.96 | Sacrificed        |                                                                      |
| G-D7-M5 | ♀   | 21.82        | 21.92 | 21.95 | 22.41 | 22.24 | 22.63 | 22.9  | 22.6  | Sacrificed        |                                                                      |
| G-D7-M6 | ♀   | 19.6         | 18.94 | 19.53 | 20.4  | 20.4  | 21.1  | 21    | 20.98 | Sacrificed        |                                                                      |

\*Body-weight/g. Blue, retained for re-infected protection testing. Green, failed infection. Yellow, significant weight loss. Red, dead, or dying. Purple, anaesthesia error resulting in death.

**Table S2. Routine blood parameters and biochemistry of mice infected with SARS-CoV-2, Related to Figure 1 and S1.**

| Tests             | Control(n=4)                | Days post-infection          |                              |                             |                              |                                 |
|-------------------|-----------------------------|------------------------------|------------------------------|-----------------------------|------------------------------|---------------------------------|
|                   |                             | Day1(n=5)                    | Day3 (n=3)                   | Day 5(n=4)                  | Day 7(n=4)                   | Deceased (n=3)†                 |
| RBC(M/ $\mu$ L)   | 6.41 $\pm$ 0.42(5.75-7.53)  | 8.46 $\pm$ 0.72(6.18-9.74)   | 6.20 $\pm$ 0.68(5.04-7.4)    | 7.11 $\pm$ 0.17(6.68-7.43)  | 6.49 $\pm$ 0.24(5.86-7.03)   | 6.84 $\pm$ 2.12(2.69-9.63)      |
| HGB(g/dL)         | 9.35 $\pm$ 0.55(8.4-10.7)   | 12.32 $\pm$ 1.07(8.8-14.4)   | 8.87 $\pm$ 0.84(7.5-10.4)    | 10.33 $\pm$ 0.27(9.7-10.9)  | 9.35 $\pm$ 0.38(8.3-10.1)    | 9.93 $\pm$ 3.14(3.8-14.2)       |
| RET(K/ $\mu$ L)   | 249 $\pm$ 23.53(185-296)    | 437 $\pm$ 47.71(318-611)     | 723 $\pm$ 329(355-1378)      | 481 $\pm$ 149 (221-907)     | 547 $\pm$ 72.5(366-668)*     | 389 $\pm$ 203(68.1-763.7)       |
| RET (%)           | 3.88 $\pm$ 0.28(3.21-4.59)  | 5.32 $\pm$ 0.76(4.24-8.29) * | 13.08 $\pm$ 7.17(4.79-27.35) | 6.72 $\pm$ 1.96(3.02-12.2)  | 8.56 $\pm$ 1.35(5.21-11.25)* | 4.85 $\pm$ 1.6(2.53-7.93)       |
| PLT(K/ $\mu$ L)   | 958.5 $\pm$ 84.01(763-1144) | 931.4 $\pm$ 54.82(721-1036)  | 926 $\pm$ 114.29(765-1147)   | 892.75 $\pm$ 26.10(815-926) | 1011 $\pm$ 117(788-1309)     | 1406 $\pm$ 229(972-1751)        |
| MPV(fL)           | 7.9 $\pm$ 0.11(7.7-8.2)     | 8.08 $\pm$ 0.55(5.9-8.8)     | 8.6 $\pm$ 0.15(8.4-8.9) *    | 8.85 $\pm$ 0.35(8.4-9.9)*   | 8.2 $\pm$ 0.08(8-8.4)        | 8.5 $\pm$ 0.31(8.1-9.1)         |
| WBC(K/ $\mu$ L)   | 2.48 $\pm$ 0.36(1.8-3.48)   | 3.44 $\pm$ 0.20(3.02-4.07) * | 6.02 $\pm$ 0.78(4.48-7.04)** | 3.91 $\pm$ 0.30(3.34-4.6)*  | 4.36 $\pm$ 0.84(2.3-6.38)    | 2.62 $\pm$ 0.47(1.67-3.15)      |
| NEUT(K/ $\mu$ L)  | 0.26 $\pm$ 0.03(0.2-0.35)   | 0.85 $\pm$ 0.16(0.51-1.41) * | 0.77 $\pm$ 0.14(0.55-1.02)** | 0.57 $\pm$ 0.09(0.4-0.77)*  | 0.57 $\pm$ 0.18(0.23-1.06)   | 1.63 $\pm$ 0.36(0.93-2.12) **   |
| LYMPH(K/ $\mu$ L) | 2.16 $\pm$ 0.37(1.53-3.22)  | 2.42 $\pm$ 0.20(1.98-2.93)   | 4.93 $\pm$ 0.73(3.48-5.72)*  | 3.15 $\pm$ 0.28(2.56-3.67)  | 3.57 $\pm$ 0.62(1.96-4.92)   | 0.82 $\pm$ 0.07(0.68-0.93) *    |
| MONO(K/ $\mu$ L)  | 0.03 $\pm$ 0.01(0.02-0.04)  | 0.12 $\pm$ 0.03(0.06-0.22) * | 0.23 $\pm$ 0.05(0.14-0.32)** | 0.16 $\pm$ 0.04(0.07-0.24)* | 0.14 $\pm$ 0.05(0.06-0.28)   | 0.14 $\pm$ 0.07(0.05-0.28)      |
| NEUT (%)          | 11.1 $\pm$ 1.90(5.8-14.8)   | 24.56 $\pm$ 4.21(14.8-38.8)* | 13.2 $\pm$ 2.47(8.4-16.6)    | 14.5 $\pm$ 2.27(9.4-19.6)   | 12.4 $\pm$ 1.87(8.6-16.6)    | 61.37 $\pm$ 3.35(55.7-67.3) *** |
| LYMPH (%)         | 86.4 $\pm$ 2.23(81.9-92.5)  | 70.62 $\pm$ 4.73(54.5-72)*   | 81.6 $\pm$ 3.04(77.7-87.6)   | 80.5 $\pm$ 2.4(74-84.2)     | 82.7 $\pm$ 2.07(77.1-86.4)   | 32.87 $\pm$ 3.93(28.4-40.7) *** |
| MONO (%)          | 1.08 $\pm$ 0.10(0.8-1.3)    | 3.4 $\pm$ 0.75(2.0-6.1) *    | 3.9 $\pm$ 0.92(2.1-5.1)*     | 4 $\pm$ 1.01(2.1-5.8)*      | 3.05 $\pm$ 0.53(1.9-4.4)*    | 5.03 $\pm$ 2.08(2.9-9.2)        |
|                   | Control(n=3)                | Day1(n=4)                    | Day3(n=3)                    | Day 5(n=5)                  | Day 7(n=4)                   | Deceased (n=2)                  |
| BUN (mg/dL)       | 17 $\pm$ 0.41(16-18)        | 17 $\pm$ 0.41(16-18)         | 17 $\pm$ 0.57(16-18)         | 43.4 $\pm$ 27.66(14-154)    | 15.75 $\pm$ 0.25(15-16)      | 36.5 $\pm$ 19.5(17-56)          |
| ALT (U/L)         | 65.67 $\pm$ 5.66(60-77)     | 66.25 $\pm$ 2.25 (60-70)     | 72.33 $\pm$ 9.94 (60-92)     | 123.66 $\pm$ 56(60-350)     | 74 $\pm$ 8.86(60-99)         | 80.5 $\pm$ 11.5(69-92)          |
| AST (U/L)         | 25.66 $\pm$ 4.33(18-33)     | 55 $\pm$ 15.72(29-100)       | 45 $\pm$ 6(33-51)            | 200 $\pm$ 117(56-433)       | 36.75 $\pm$ 3.12(31-45)      | 103 $\pm$ 5(98-108) **          |
| CK( U/L)          | 141 $\pm$ 47.06(60-223)     | 627 $\pm$ 228(262-1216)      | 522 $\pm$ 109(322-699) *     | 508 $\pm$ 163(183-678)      | 320 $\pm$ 142(172-749)       | 1040 $\pm$ 365(675-1405) *      |

Significant difference of SARS-CoV-2-inoculated mice vs. mock-infected mice were performed by two-tailed Student's t-tests, \*\*\* $P < 0.001$ , \*\* $P < 0.01$ , \* $P < 0.05$ . †, three deceased mice 6 DPI (one was from the infected group and the other two were from the survival test group). At each time point, 3-5 mice each were inoculated with SARS-CoV-2, then analysed and the results were presented as the mean  $\pm$  SEM. Results from mock-infected mice were presented as the mean  $\pm$  SEM.

**Table S3. Genome comparison of the re-isolated virus with the original viral genome, Related to Figure 3 and S4.**

| Sample    | Genome (Start, end) | Gene Mutation (nt, aa)                         |
|-----------|---------------------|------------------------------------------------|
| Reference | 1-29891             | -                                              |
| Lung      | 10-29863            | nsp13, C14554T, L372F<br>Spike, C23525T, H644Y |
| Brain     | 10-29860            | Spike, C23525T, H644Y                          |

**Table S4. Neutralisation antibody titre of re-infected mouse serum, Related to Figure 4 and 5.**

| Group           | Mice No. | Neutralisation antibody titre |                                           |                        |
|-----------------|----------|-------------------------------|-------------------------------------------|------------------------|
|                 |          | 14 days post-infection        | 21 days post-infection (re-infection day) | 26 days post-infection |
| Naïve infection | 3/3      | NT                            | ND                                        | ND                     |
|                 | 1        | <1:10                         | <1:10                                     | <1:10                  |
| Challenge       | 2        | <1:10                         | 1:40                                      | 1:40                   |
|                 | 3        | <1:10                         | <1:10                                     | <1:10                  |

NT, not tested. ND, not detected

**Table S5. Viral RNA detection in mice after reinfection, Related to Figure 5.**

| Group           | Number (M/F)* | Number of viral RNA positive |       |       |     |       |       |        |        |            |              |
|-----------------|---------------|------------------------------|-------|-------|-----|-------|-------|--------|--------|------------|--------------|
|                 |               | Lung                         | Brain | Serum | Eye | Heart | Liver | Spleen | Kidney | Intestines | Testis/Ovary |
| Naïve infection | (1/2)         | 3/3                          | 2/3   | 0/3   | 1/3 | 3/3   | 3/3   | 2/3    | 3/3    | 2/3        | 1/3          |
| Challenge       | (1/2)         | 3/3                          | 0/3   | 0/3   | 0/3 | 1/3   | 2/3   | 1/3    | 2/3    | 0/3        | 1/3          |

\*, M, male, F, female
